# Supplementary material for: Risk factors associated with development and persistence of long COVID
Source: bioRxiv or medRxiv preprint supplement (doi:10.1101/2021.09.22.21263998), 2021-09-23
Supplement: Supplementary file [file media-1.pdf]

## Appendix 1. Questionnaire

If you consent to participate in this survey, please put a check mark in the  below and write the date on which you responded to the survey.

I hereby consent to participate in this study.

**Response date (using the format Month/Day/Year):** \_\_\_\_ / \_\_\_\_ /2021

1) The following questions are about you. For multiple-choice questions, please circle the answer that applies to you. For questions that include parentheses ( ), please write your answer inside the parentheses.

Age ( ) years

Sex

1. Male
2. Female

Height ( ) cm

Weight ( ) kg

History of smoking

3. Yes
4. No

History of alcohol consumption

1. Yes
2. No

Medical history (past illnesses)

1. Hypertension
2. Diabetes
3. Dyslipidemia
4. Bronchial asthma
5. Chronic obstructive pulmonary disease (COPD)
6. Myocardial infarction

7. Melanoma
8. Connective tissue/rheumatic disease
9. Immune deficiency disease
10. Chronic kidney disease
11. Other (            )

Obstetric history (women)

1. I had a pregnancy before I was infected with coronavirus.
2. I was pregnant when I was infected with coronavirus.
3. I have never been pregnant.

2) The following questions are about the course of your coronavirus infection. Please circle the answers that apply to you.

|                                          |        |       |                 |
|------------------------------------------|--------|-------|-----------------|
| I was diagnosed with pneumonia           | 1. Yes | 2. No | 3. I don't know |
| I was administered oxygen once or more   | 1. Yes | 2. No | 3. I don't know |
| I was put on a ventilator once or more   | 1. Yes | 2. No | 3. I don't know |
| I was treated with ECMO once or more     | 1. Yes | 2. No | 3. I don't know |
| I was prescribed antivirals <sup>1</sup> | 1. Yes | 2. No | 3. I don't know |
| I was prescribed steroids <sup>2</sup>   | 1. Yes | 2. No | 3. I don't know |

Notes: 1) Antivirals are drugs used to COVID-19, such as remdesivir (Veklury), favipiravir (Avigan), ivermectin (Stromectol), lopinavir/ritonavir (Kaletra), hydroxychloroquine (Plaquenil), and azithromycin (Zithromax).

2) Steroids refer to drugs that inhibit inflammation, such as dexamethasone (Dexart), prednisolone (Predonin), and methylprednisolone (Solu-Medrol).

3) The following questions are about the aftereffects of COVID-19. Please note whether you experienced the following symptoms. If yes, please write the duration of that symptom in days. If you are unsure, please write the approximate duration.

Example: If you had a symptom for 20 days starting on day 30 after coronavirus infection, please respond as follows:

Yes

1. If yes, A. Since infection

a. For ( 20 ) days

2. No

B. Since day ( 30 ) after infection

b. Ongoing

### **Fever**

1. Yes

1. If yes, A. Since infection  
infection

a. For ( ) days

2. No

B. Since day ( ) after

b. Ongoing

### **Fatigue (Sluggishness)**

1. Yes

1. If yes, A. Since infection  
infection

a. For ( ) days

2. No

B. Since day ( ) after

b. Ongoing

### **Shortness of breath (Difficulty breathing)**

1. Yes

1. If yes, A. Since infection  
infection

a. For ( ) days

2. No

B. Since day ( ) after

b. Ongoing

### **Joint pain**

1. Yes

2. No

1. If yes, A. Since infection  
infection

B. Since day ( ) after

a. For ( ) days

b. Ongoing

**Myalgia (Muscle pain)**

1. Yes

2. No

1. If yes, A. Since infection  
infection

B. Since day ( ) after

a. For ( ) days

b. Ongoing

**Chest pain**

1. Yes

2. No

1. If yes, A. Since infection  
infection

B. Since day ( ) after

a. For ( ) days

b. Ongoing

**Cough**

1. Yes

2. No

1. If yes, A. Since infection  
infection

B. Since day ( ) after

a. For ( ) days

b. Ongoing

**Abdominal pain (Stomach pain)**

1. Yes

2. No

1. If yes, A. Since infection  
infection

B. Since day ( ) after

a. For (            ) days

b. Ongoing

**Dysosmia (loss of smell)**

1. Yes

2. No

1. If yes, A. Since infection  
infection

B. Since day (            ) after

a. For (            ) days

b. Ongoing

**Dysgeusia (loss of taste)**

1. Yes

2. No

1. If yes, A. Since infection  
infection

B. Since day (            ) after

a. For (            ) days

b. Ongoing

**Nasal discharge**

1. Yes

2. No

1. If yes, A. Since infection  
infection

B. Since day (            ) after

a. For (            ) days

b. Ongoing

**Bloodshot eyes**

1. Yes

2. No

1. If yes, A. Since infection  
infection

B. Since day (            ) after

a. For (            ) days

b. Ongoing

**Headache**

1. Yes

2. No

1. If yes, A. Since infection  
infection

B. Since day ( ) after

a. For ( ) days

b. Ongoing

**Phlegm**

1. Yes

2. No

1. If yes, A. Since infection  
infection

B. Since day ( ) after

a. For ( ) days

b. Ongoing

**Sore throat**

1. Yes

2. No

1. If yes, A. Since infection  
infection

B. Since day ( ) after

a. For ( ) days

b. Ongoing

**Diarrhea**

1. Yes

2. No

1. If yes, A. Since infection  
infection

B. Since day ( ) after

a. For ( ) days

b. Ongoing

**Nausea/vomiting**

1. Yes

2. No

1. If yes, A. Since infection  
infection

B. Since day ( ) after

a. For ( ) days

b. Ongoing

### **Loss of appetite**

1. Yes

2. No

1. If yes, A. Since infection  
infection

B. Since day ( ) after

a. For ( ) days

b. Ongoing

### **Hair loss**

1. Yes

2. No

1. If yes, A. Since infection  
infection

B. Since day ( ) after

a. For ( ) days

b. Ongoing

i. In patches

ii. Diffuse hair loss

iii. Don't know

### **Depression**

1. Yes

2. No

1. If yes, A. Since infection  
infection

B. Since day ( ) after

a. For ( ) days

b. Ongoing

### **Loss of concentration**

1. Yes

2. No

1. If yes, A. Since infection

B. Since day ( ) after

infection

a. For (            ) days

b. Ongoing

**Memory disturbance (forgetfulness)**

1. Yes

2. No

1. If yes, A. Since infection

B. Since day (            ) after

infection

a. For (            ) days

b. Ongoing



**Appendix 2. The number of the participants with COVID-19 symptoms and their persistence**

| symptoms    | Number (% <sup>a</sup> ) | Lasting more than 4 weeks (% <sup>a</sup> ) | Lasting more than 12 weeks (% <sup>a</sup> ) | Late onset (% <sup>b</sup> ) |
|-------------|--------------------------|---------------------------------------------|----------------------------------------------|------------------------------|
| fever       | 293 (64.1)               | 12 (2.6)                                    | 1 (0.2)                                      | 2 (0.7)                      |
| fatigue     | 292 (64.0)               | 93 (20.4)                                   | 47 (10.3)                                    | 8 (2.7)                      |
| dysosmia    | 219 (47.9)               | 104 (22.8)                                  | 62 (13.6)                                    | 4 (1.8)                      |
| cough       | 214 (46.8)               | 68 (14.9)                                   | 21 (4.6)                                     | 4 (1.9)                      |
| dysgeusia   | 185 (40.6)               | 69 (15.1)                                   | 30 (6.6)                                     | 2 (1.1)                      |
| headache    | 173 (37.9)               | 32 (7.0)                                    | 18 (3.9)                                     | 3 (1.7)                      |
| LoA         | 171 (37.6)               | 24 (5.3)                                    | 9 (2.0)                                      | 0 (0)                        |
| SoB         | 163 (35.7)               | 55 (12.0)                                   | 25 (5.5)                                     | 4 (2.5)                      |
| joint pain  | 153 (33.5)               | 20 (4.4)                                    | 15 (3.3)                                     | 5 (3.3)                      |
| sore throat | 139 (30.5)               | 12 (2.6)                                    | 5 (1.1)                                      | 1 (0.7)                      |
| LoC         | 137 (30.0)               | 95 (20.8)                                   | 70 (15.3)                                    | 10 (7.3)                     |
| depression  | 125 (27.5)               | 79 (17.3)                                   | 55 (12.0)                                    | 16 (12.8)                    |
| myalgia     | 113 (24.7)               | 16 (3.5)                                    | 11 (2.4)                                     | 3 (2.7)                      |
| diarrhea    | 111 (24.3)               | 6 (1.3)                                     | 4 (0.9)                                      | 2 (1.8)                      |

|                   |            |           |           |           |
|-------------------|------------|-----------|-----------|-----------|
| sputum            | 109 (23.9) | 25 (5.5)  | 13 (2.8)  | 2 (1.8)   |
| hair loss         | 103 (22.7) | 73 (16.0) | 29 (6.3)  | 58 (56.3) |
| MD                | 102 (22.5) | 88 (19.3) | 78 (17.1) | 17 (16.7) |
| runny nose        | 96 (21.1)  | 14 (3.1)  | 9 (2.0)   | 0 (0)     |
| chest pain        | 92 (20.1)  | 32 (7.0)  | 18 (3.9)  | 7 (7.6)   |
| abdominal<br>pain | 47 (10.3)  | 3 (0.7)   | 1 (0.2)   | 0 (0)     |
| nausea            | 36 (7.9)   | 4 (0.9)   | 3 (0.7)   | 0 (0)     |
| conjunctivitis    | 32 (7.0)   | 4 (0.9)   | 1 (0.2)   | 0 (0)     |

Abbreviations: LoA, loss of appetite; SoB, shortness of breath; LoC, loss of concentration; MD,

memory disturbance.

<sup>a</sup>Calculated by dividing the number of patients by the total number of participants (n =457).

<sup>b</sup>Calculated by dividing the number of patients by the number of participants who experienced

the symptoms (N=457).

### Appendix 3. Acute symptoms associated with COVID-19

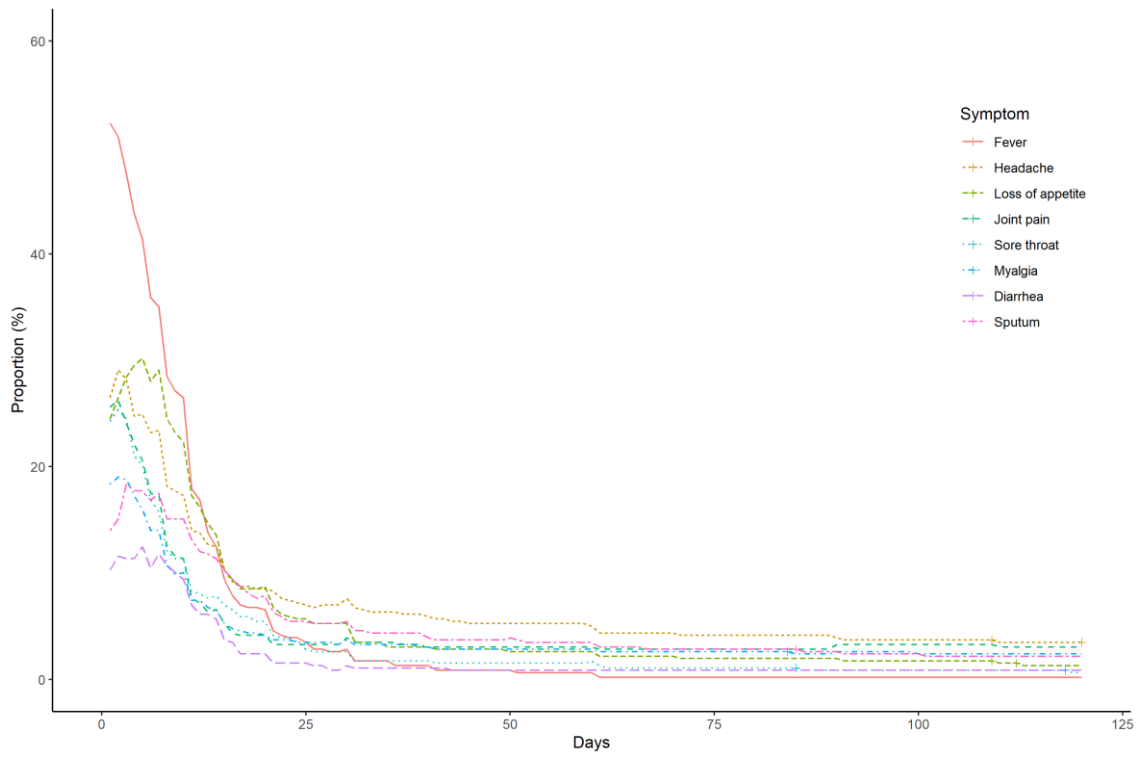

### Appendix 4a. Risk factors for development of fatigue in patients with COVID-19

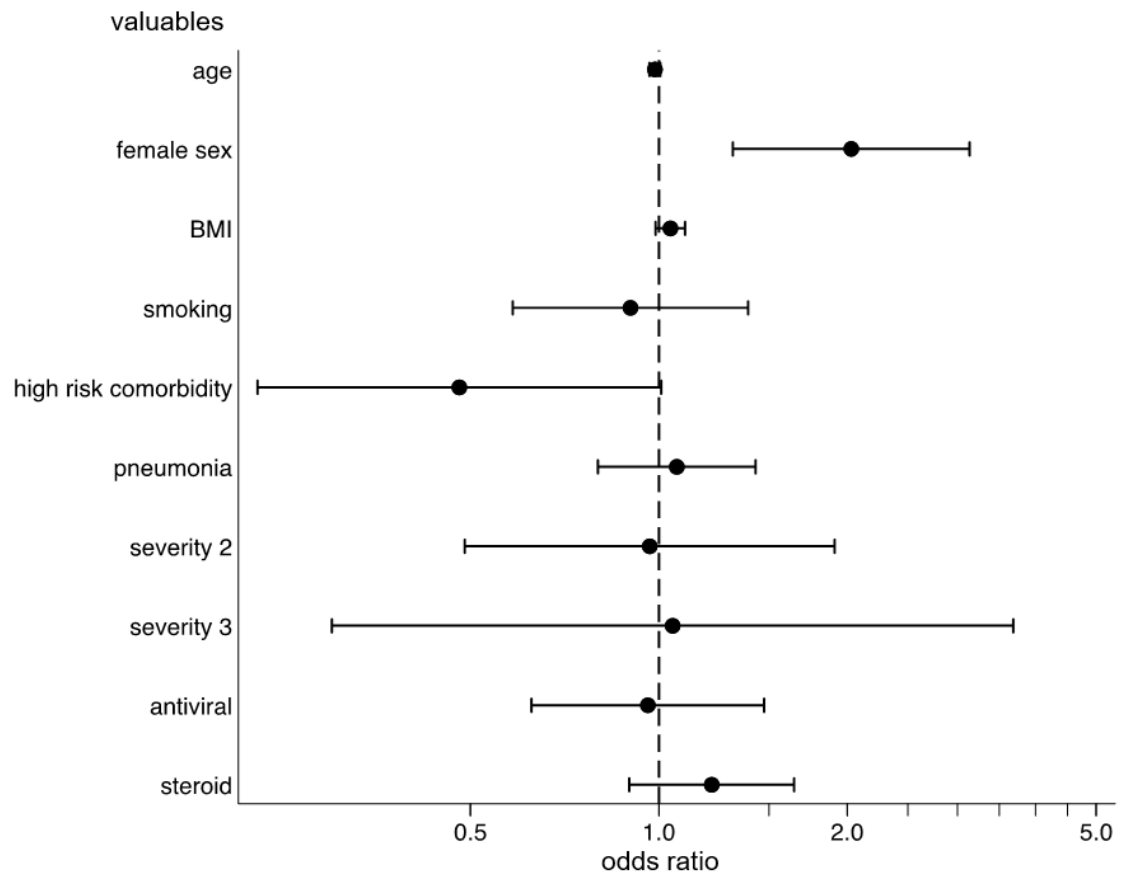

\*Abbreviation: BMI, body mass index.  
severity 2: moderate severity compared to mild severity  
severity 3: severe severity compared to mild severity

**Appendix 4b. Risk factors for persistence of fatigue among patients with fatigue**

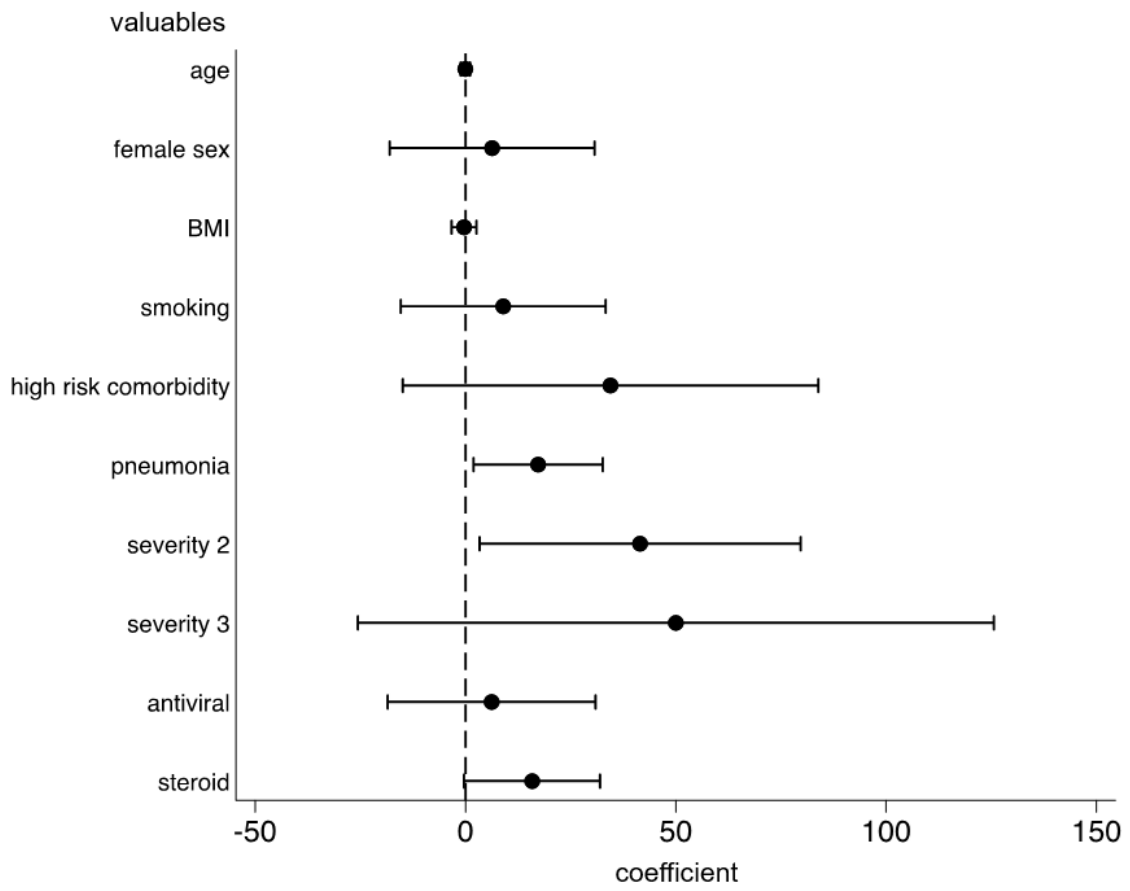

\*Abbreviation: BMI, body mass index.  
severity 2: moderate severity compared to mild severity  
severity 3: severe severity compared to mild severity

### Appendix 5a. Risk factors for development of dysgeusia in patients with COVID-19

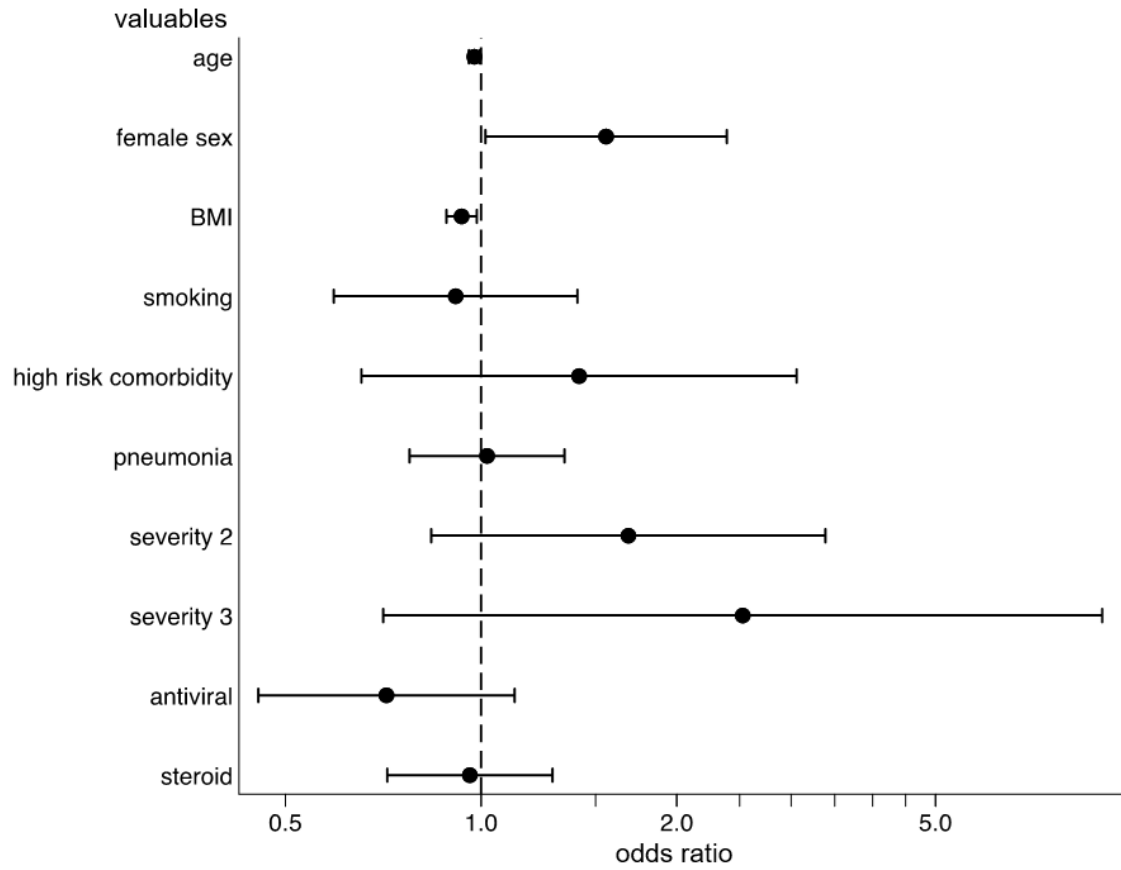

\*Abbreviation: BMI, body mass index.  
severity 2: moderate severity compared to mild severity  
severity 3: severe severity compared to mild severity

### Appendix 5b. Risk factors for persistence of dysgeusia among patients with dysgeusia

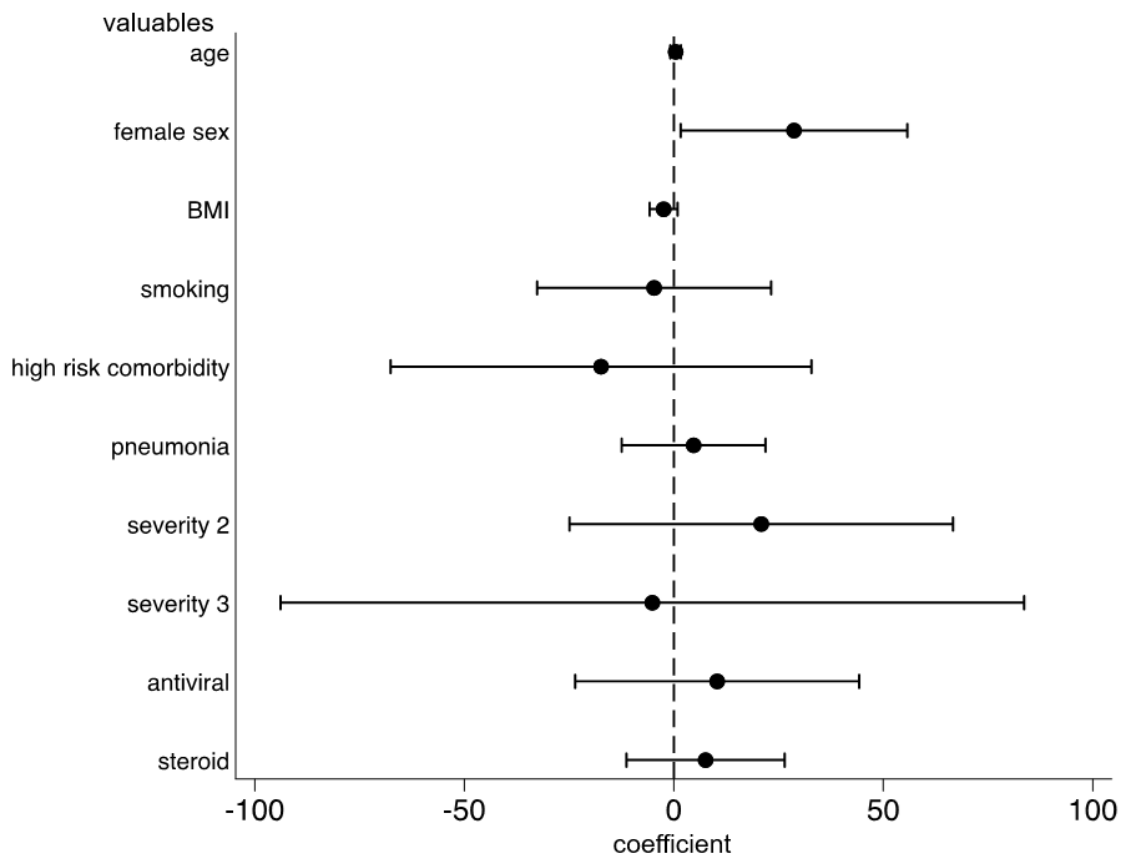

\*Abbreviation: BMI, body mass index.  
severity 2: moderate severity compared to mild severity  
severity 3: severe severity compared to mild severity

**Appendix 6a. Risk factors for development of dysosmia in patients with COVID-19**

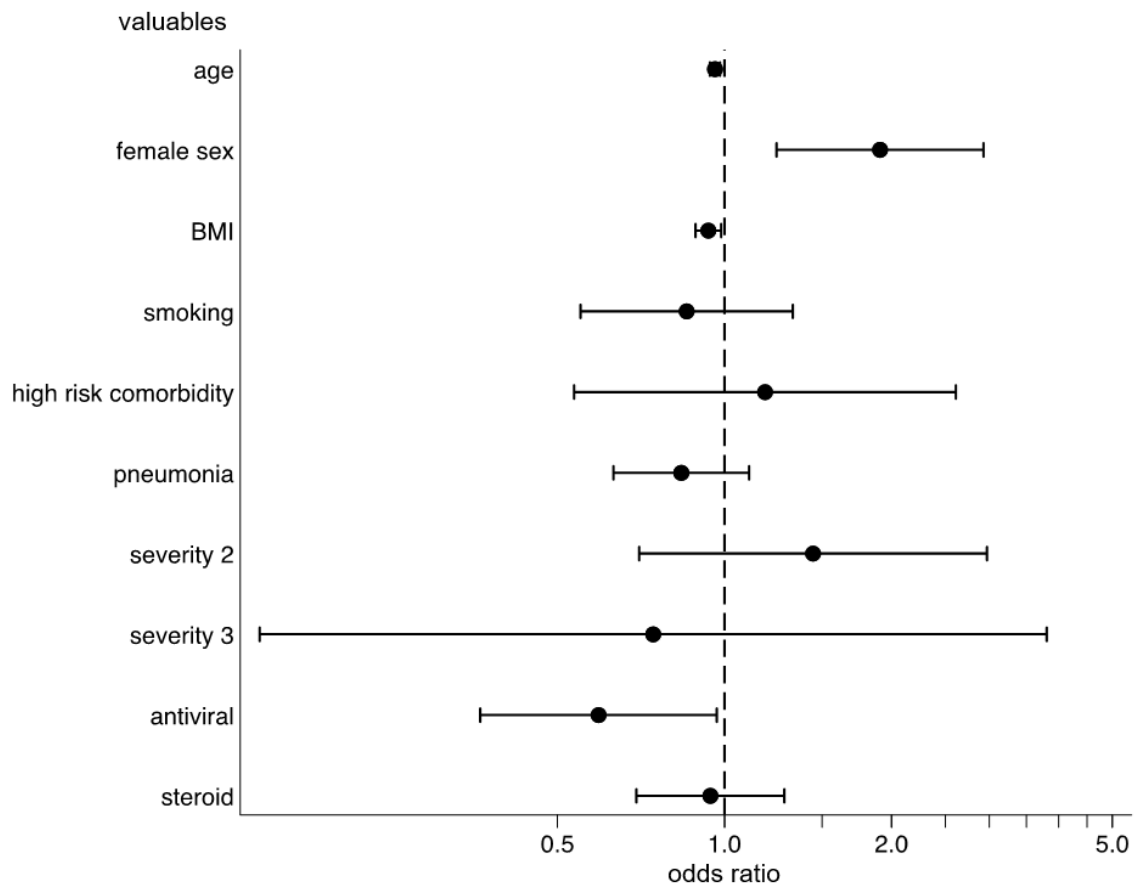

\*Abbreviation: BMI, body mass index.  
 severity 2: moderate severity compared to mild severity  
 severity 3: severe severity compared to mild severity



**Appendix 6b. Risk factors for persistence of dysosmia among patients with dysosmia**

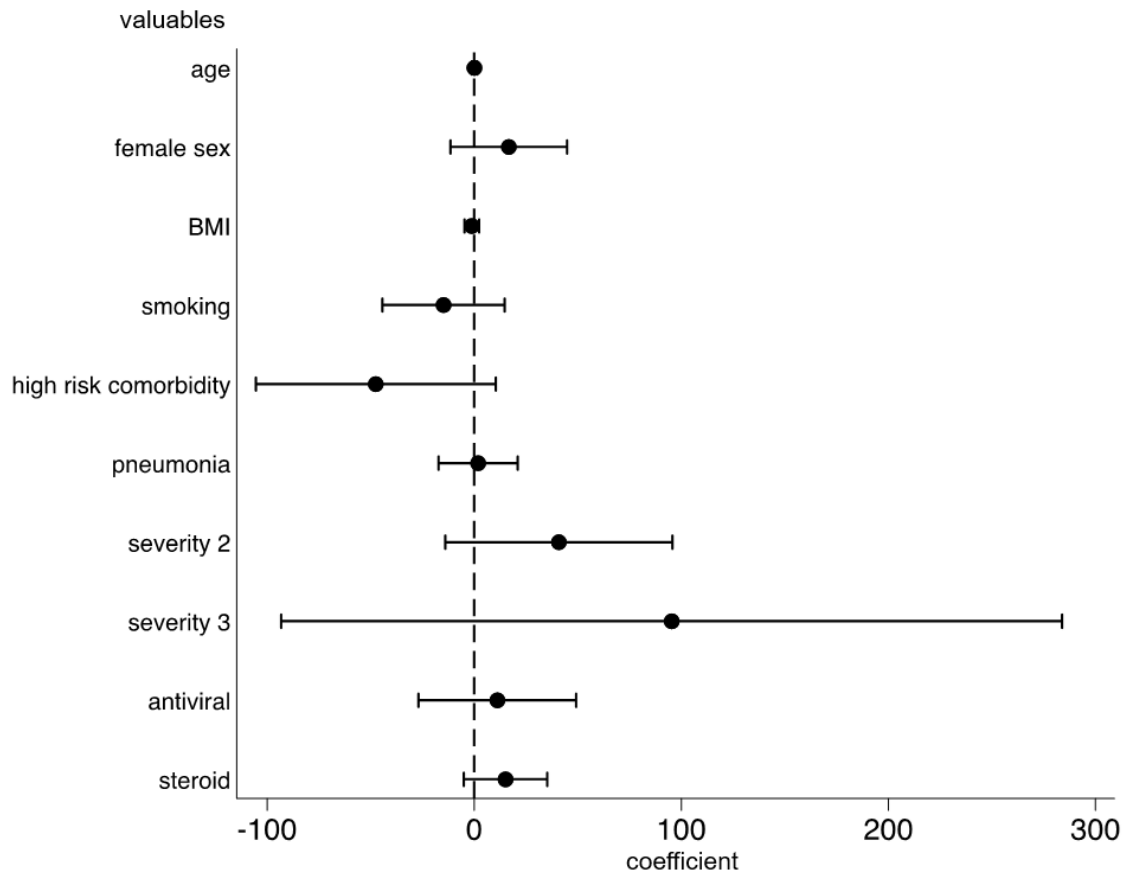

\*Abbreviation: BMI, body mass index.  
 severity 2: moderate severity compared to mild severity  
 severity 3: severe severity compared to mild severity

### Appendix 7. Risk factors for development of hair loss in patients with COVID-19

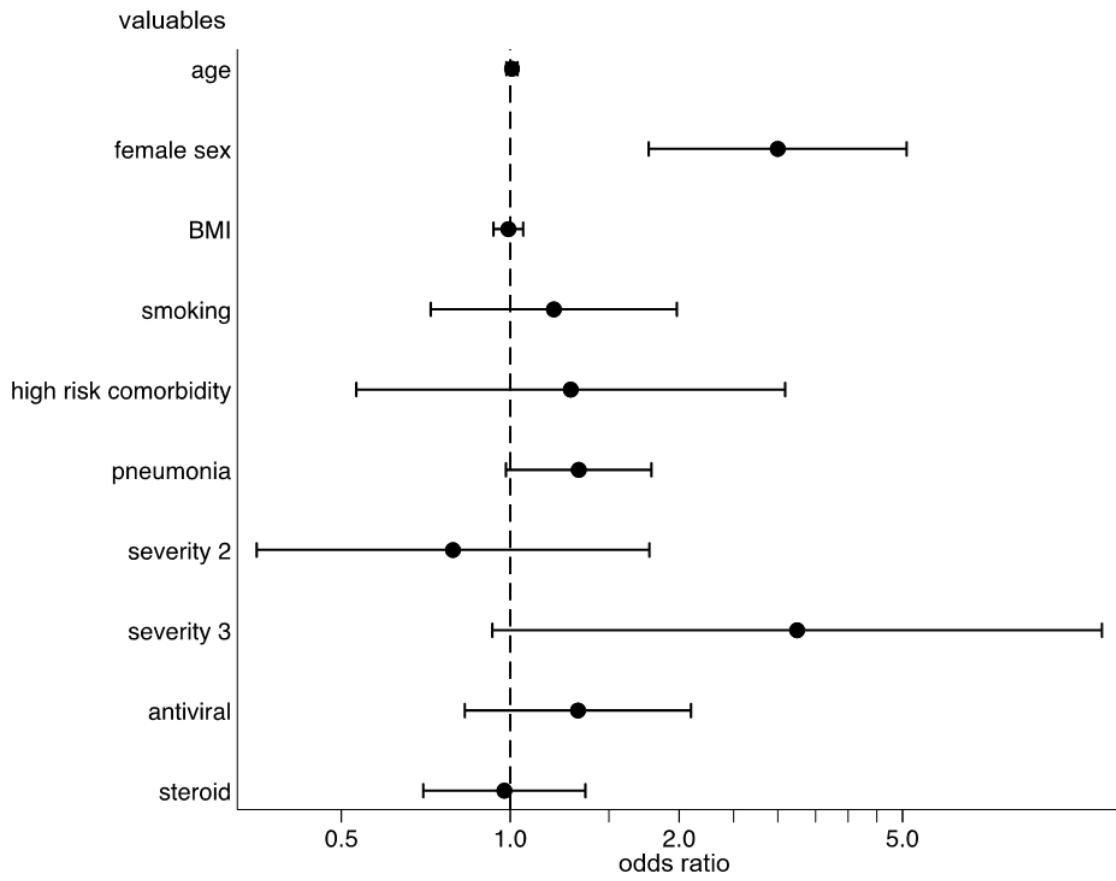

\*Abbreviation: BMI, body mass index.  
severity 2: moderate severity compared to mild severity  
severity 3: severe severity compared to mild severity
